# Supplementary material
Source: PubMed Central journal article supplement (PMC4808427)

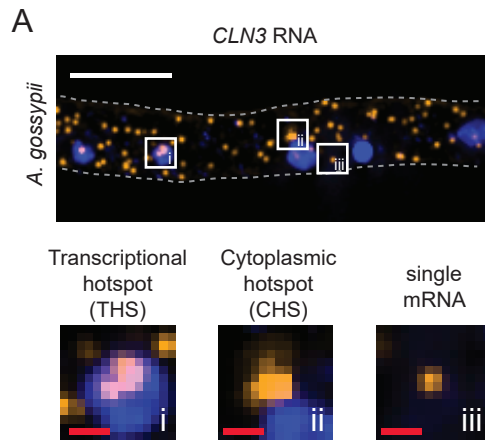

**B**

| Nuc ID | Coordinates (X,Y,Z; $\mu\text{m}$ ) | # mRNA in ROI (Sphere, rad: 2 $\mu\text{m}$ ) | # THS | # CHS (# mRNA eq.) |
|--------|-------------------------------------|-----------------------------------------------|-------|--------------------|
| 1      | 1.2, 5.4, 7.9                       | 13                                            | 0     | 0                  |
| 2      | 5.3, 5.5, 6.6                       | 7                                             | 1     | 0                  |
| 3      | 12.23, 5.5, 8.1                     | 8.5                                           | 0     | 1(3)               |
| 4      | 15.3, 5.2, 7.9                      | 4.5                                           | 0     | 0                  |
| 5      | 21.0, 4.4, 8.8                      | 5                                             | 0     | 0                  |

Supplement: NIHMS746608-supplement-2.pdf [file NIHMS746608-supplement-2.pdf]

### CLN3 smFISH detection

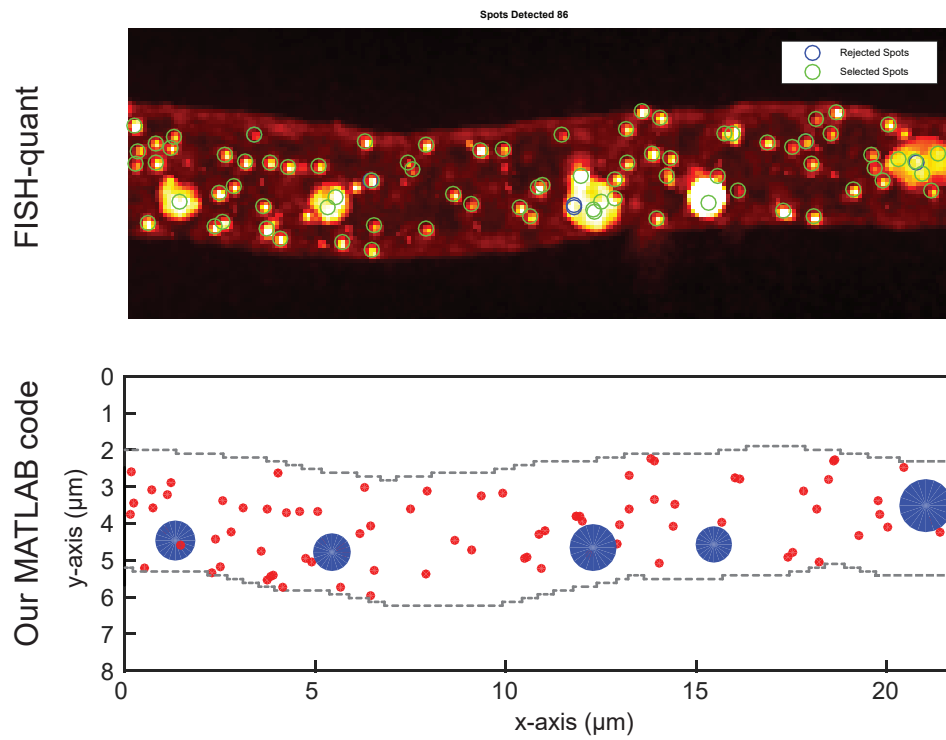

Supplement: NIHMS746608-supplement-6.pdf [file NIHMS746608-supplement-6.pdf]
